# Supplementary material for: Juvenile onset autoinflammatory disease due to a novel mutation in TNFAIP3 (A20)
Source: PubMed Central journal article supplement (PMC6288856; doi:10.1186/s13075-018-1766-x), 2018-12-10
Supplement: 13075_2018_1766_MOESM1_ESM.pdf [file 13075_2018_1766_MOESM1_ESM.pdf]

## Laboratory Findings and Cytokine/Chemokine profile on Admission

| Peripheral blood                  |                            | Serological tests              |                        | Cytokine/Chemokine profile |                | Healthy(n=40) median(interquartile range) |
|-----------------------------------|----------------------------|--------------------------------|------------------------|----------------------------|----------------|-------------------------------------------|
| Red blood cells                   | 427 × 10 <sup>4</sup> /μL  | C-reactive protein             | 0.55 mg/dL (<0.30)     | IL-1β                      | 6.46 pg/mL     | 0.9(0.3-1.5) pg/mL                        |
| Hemoglobin                        | 12.9 g/dL                  | Erythrocyte sedimentation rate | 8 mm/hr (<15)          | IL-1RA                     | 44.66 pg/mL    | 38.7(27.5-68.7) pg/mL                     |
| Hematocrit                        | 39.3%                      | sIL-2R                         | 315 U/ml (121-613)     | IL-2                       | 5.57 pg/mL     | 1.1(0.5-2.1) pg/mL                        |
| Plt                               | 17.9 × 10 <sup>4</sup> /μL | Serum amyloid A                | 30 μg/dL (<8.0)        | IL-4                       | 326.56 pg/mL   | 1.0(0.11-4.2) pg/mL                       |
| White blood cells                 | 7,700 /μL                  | IgG                            | 1,583 mg/dL (870-1700) | IL-5                       | 2.48 pg/mL     | 1.1(0.9-1.5) pg/mL                        |
| Neutrophil                        | 51.0%                      | IgA                            | 355 mg/dL (110-410)    | IL-6                       | 27.85 pg/mL    | 0.6(0.1-1.9) pg/mL                        |
| Eosinophil                        | 2.0%                       | IgM                            | 92 mg/dL (35-220)      | IL-7                       | 20.21 pg/mL    | 6.0(2.4-9.6) pg/mL                        |
| Monocyte                          | 11.0%                      | C3                             | 102 mg/dL (65-135)     | IL-8                       | 158.63 pg/mL   | 36.0(14.0-112.4) pg/mL                    |
| Lymphocyte                        | 35.0%                      | C4                             | 25 mg/dL (13-35)       | IL-10                      | 14.73 pg/mL    | 1.4(0.1-2.5) pg/mL                        |
| Baso                              | 1.0%                       | ANA                            | 160 Homogeneous (<×40) | IL-12p40                   | 84.44 pg/mL    | 8.9(0.9-16.7) pg/mL                       |
| <b>Blood chemistry</b>            |                            | Anti-ds-DNA Ab                 | (-) (<9.9)             | IL-12p70                   | 8.10 pg/mL     | 4.5(3.0-9.5) pg/mL                        |
| Total protein                     | 7.3 g/dL                   | Anti-sm Ab                     | (-) (<6.9)             | IL-17                      | 5.69 pg/mL     | 4.7(2.5-7.8) pg/mL                        |
| Total bilirubin                   | 0.7 mg/dL                  | Anti-U1RNP Ab                  | (-) (<4.9)             | TNF-α                      | 211.66 pg/mL   | 7.2(5.3-8.9) pg/mL                        |
| Albumin                           | 4.3 g/dL                   | Anti-SSA Ab                    | (-) (<6.9)             | IFN-γ                      | 35.33 pg/mL    | 13.08(6.9-22.4) pg/mL                     |
| Glutamic-oxaloacetic transaminase | 13 IU/L (13-33)            | Anti-SSB Ab                    | (-) (<6.9)             | G-CSF                      | 102.16 pg/mL   | 24.3(21.5-36.5) pg/mL                     |
| Glutamic-pyruvic transaminase     | 5 IU/L (8-42)              | PR3-ANCA                       | (-) (<2.0 U/mL)        | GM-CSF                     | 31.08 pg/mL    | 17.7(13.3-31.5) pg/mL                     |
| Lactate dehydrogenase             | 127 IU/L (260-119)         | MPO-ANCA                       | (-) (<3.5 U/mL)        | VEGF                       | 356.35 pg/mL   | 172.72(111.4-270) pg/mL                   |
| Alkaline phosphatase              | 424 IU/L (80-250)          | HBs Ag                         | (-)                    | FGF-2                      | 115.48 pg/mL   | 70.5(55.5-88.8) pg/mL                     |
| Creatine Kinase                   | 51 IU/L (62-287)           | HCV Ab                         | (-)                    | CCL2                       | 898.06 pg/mL   | 596.31(482.0-789.5) pg/mL                 |
| Blood urea nitrogen               | 9 mg/dL                    | <b>Urinalysis</b>              | normal                 | CCL3                       | 238.99 pg/mL   | 10.6(5.7-14.7) pg/mL                      |
| Cr                                | 0.69 mg/dL                 |                                |                        | CCL4                       | 384.69 pg/mL   | 65.3(38.9-87.0) pg/mL                     |
| Na                                | 141 mEq/L                  | <b>HLA type</b>                | A2, A51                | CCL22                      | 2,238.55 pg/mL | 860.6(633.0-968.9) pg/mL                  |
| K                                 | 4.0 mEq/L                  |                                | B62, B39               | CXCL10                     | 1,364.74 pg/mL | 218.4(178.6-302.2) pg/mL                  |
| Cl                                | 106 mEq/L                  |                                | DR4, DR14              | CX3CL1                     | 181.12 pg/mL   | 92.0(67.3-145.8) pg/mL                    |

**Abbreviation:** HBsAg; hepatitis B virus surface antigen, HCV; hepatitis C virus, MPO-ANCA; myeloperoxidase-antineutrophil cytoplasmic antibody, PR3-ANCA; proteinase 3-antineutrophil cytoplasmic antibody, sIL-2R; soluble interleukin-2 receptor, IL; interleukin, RA; receptor antagonist, CCL; chemokine ligand, TNF; tumor necrosis factor, IFN; interferon, G-CSF; granulocyte colony stimulating factor, GM-CSF; granulocyte macrophage colony stimulating factor, EGF; epidermal growth factor, VEGF; vascular endothelial growth factor, FGF; fibroblast growth factor.
